# Supplementary material for: Impact of a theory-informed and user-centered stroke information campaign on the public’s behaviors, attitudes, and knowledge when facing acute stroke: a controlled before-and-after study.
Source: Research Square preprint supplement (doi:10.21203/rs.3.rs-30192/v2), 2020-10-07

Appendix to Haesebaert et al. Impact of a theory-informed and user-centered stroke information campaign on the public’s behaviors, attitudes, and knowledge when facing acute stroke: a controlled before-and-after study. Cover title: Impact of the ReACT stroke campaign

Campaign resources

1. Campaign posters (3 visuals)

2. Information leaflet

3. Website

- url <http://avc.univ-lyon1.fr/>

- screen shot


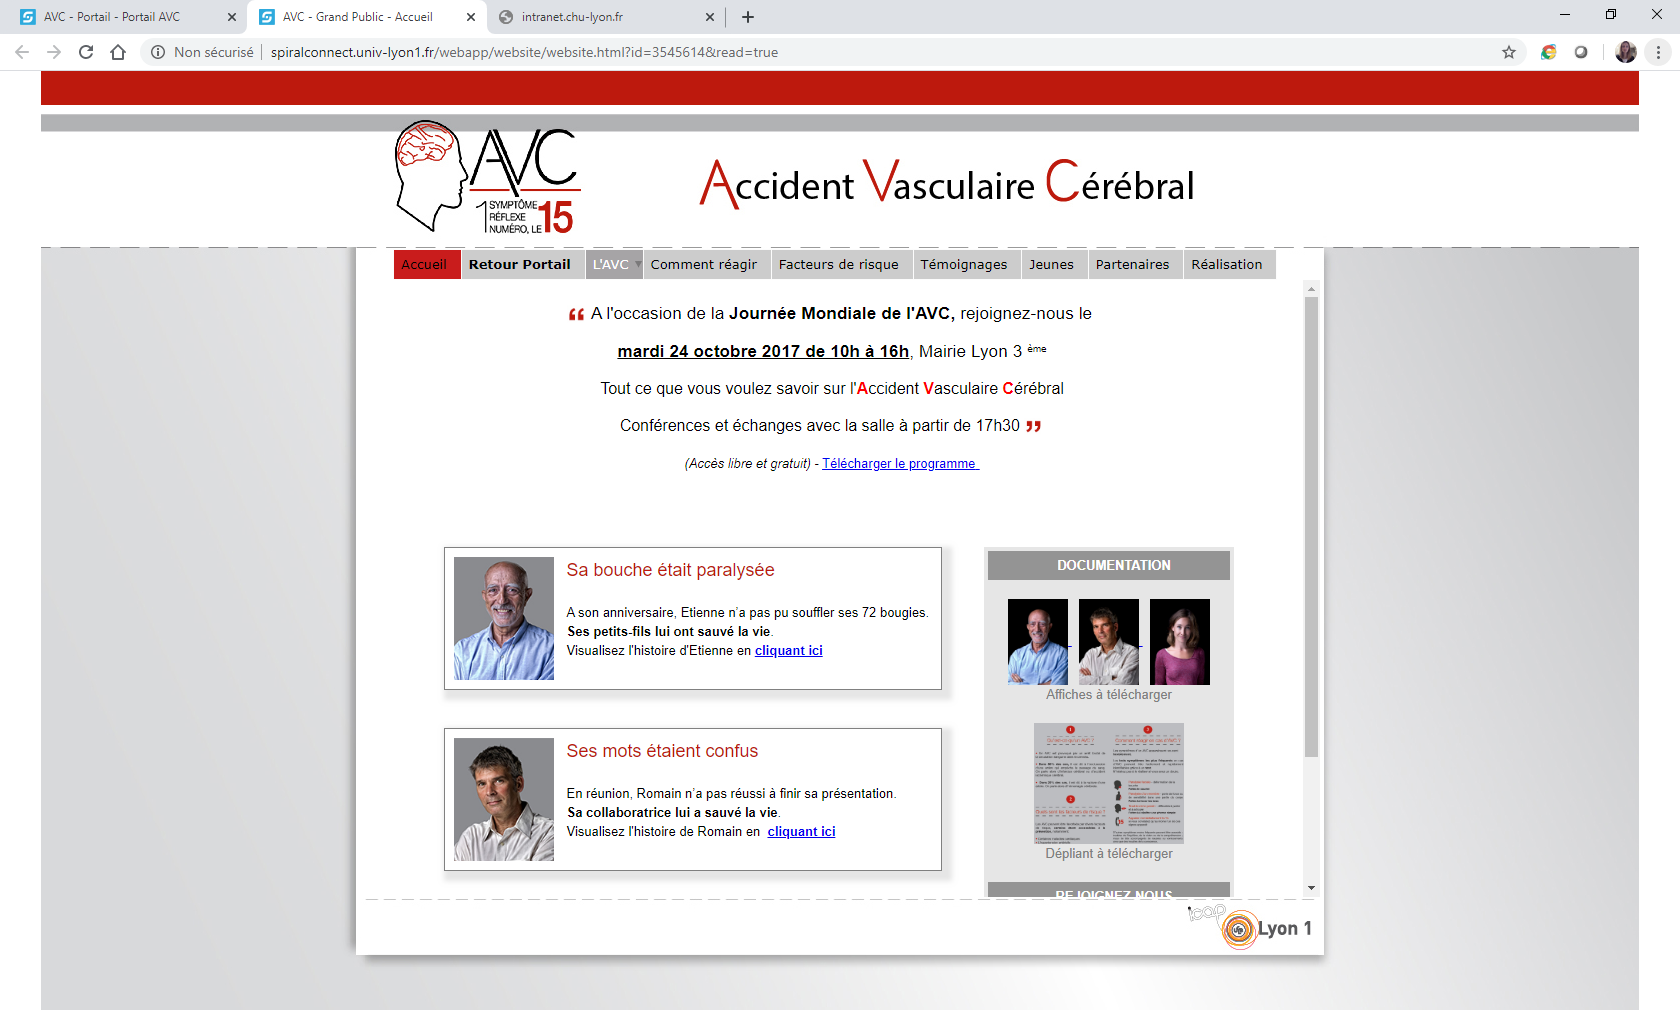


4. World stroke day event in Lyon Oct 29th, 2014.


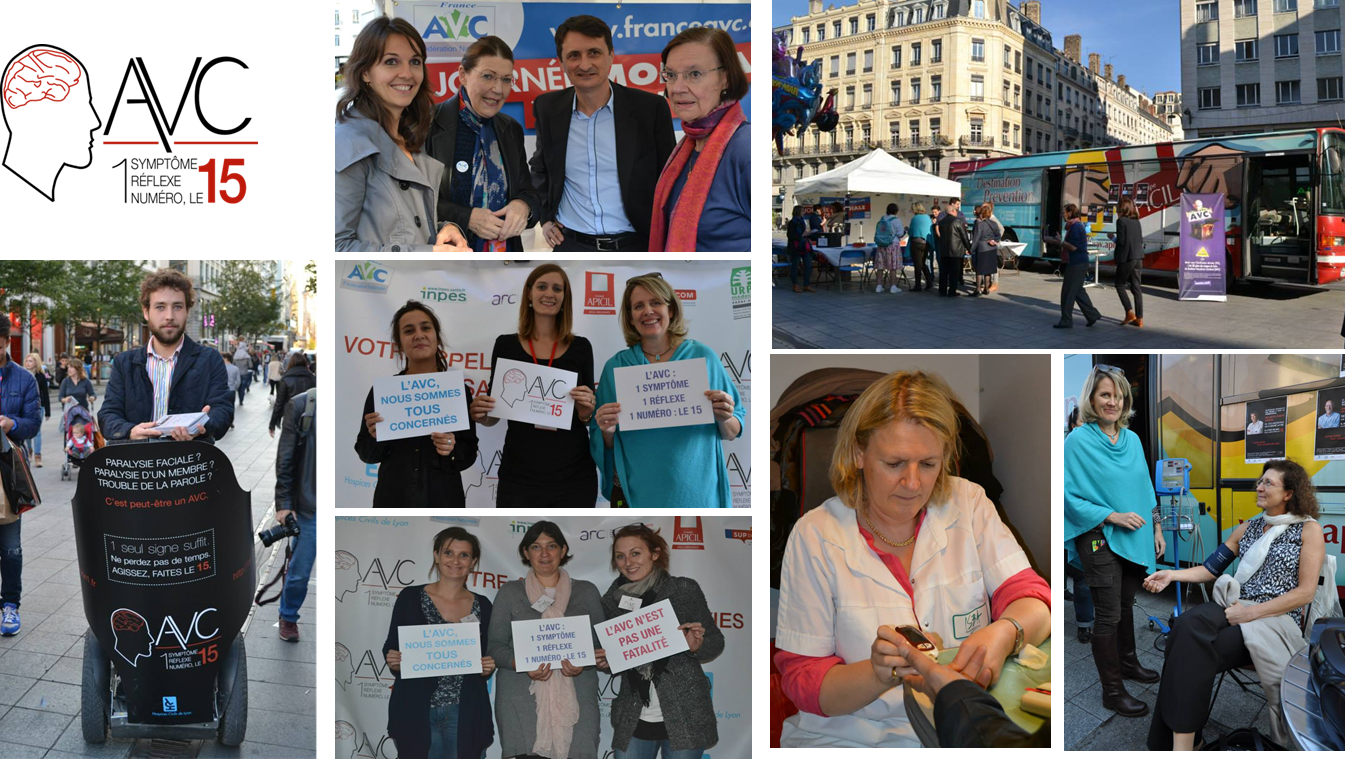

Supplement: Supplementary file 1 [file f1b352be383e5ea6fb9c971a.docx]
